# Supplementary material for: Combining Systemic Inflammation Biomarkers with Traditional Prognostic Factors to Predict Surgical Site Infections in Elderly Hip Fracture Patients: A Risk Factor Analysis and Dynamic Nomogram Development
Source: Research Square preprint supplement (doi:10.21203/rs.3.rs-5040943/v1), 2024-11-27
Supplement: Supplementary file 1 [file 4203a13166bd851d0885adc8.docx]

| **Table 1. Baseline characteristics of the study population*.** | | | | |
| --- | --- | --- | --- | --- |
| **Variables** | **Overall**  **(n=1430)** | **Non-SSI Group**  **(n=1383)** | **SSI Group**  **(n=47)** | **p** |
|  |
| **Age (years)** | 72.51 ± 7.41 | 72.38 ± 7.34 | 76.55 ± 8.30 | <0.001* |  |
| **Sex** |  |  |  | 0.442 |  |
| Males | 672 (47.0%) | 653 (47.2%) | 19 (40.4%) |  |  |
| Females | 758 (53.0%) | 730 (52.8%) | 28 (59.6%) |  |  |
| **BMI (kg/m2)** |  |  |  | 0.347 |  |
| <18.5 | 20 (1.4%) | 20 (1.4%) | 0 (0.0%) |  |  |
| 18.5-24.9 | 398 (27.8%) | 384 (27.8%) | 14 (29.8%) |  |  |
| 25-29.9 | 637 (44.5%) | 621 (44.9%) | 16 (34.0%) |  |  |
| ≥30 | 375 (26.2%) | 358 (25.9%) | 17 (36.2%) |  |  |
| **Living place** |  |  |  | 0.910 |  |
| Urban | 939 (65.7%) | 909 (65.7%) | 30 (63.8%) |  |  |
| Rural | 491 (34.3%) | 474 (34.3%) | 17 (36.2%) |  |  |
| **Currently smoking** | 366 (25.6%) | 358 (25.9%) | 8 (17.0%) | 0.230 |  |
| **Alcohol consumption** | 252 (17.6%) | 242 (17.5%) | 10 (21.3%) | 0.636 |  |
| **ASA class** |  |  |  | 0.005* |  |
| I | 145 (10.1%) | 143 (10.3%) | 2 (4.3%) |  |  |
| II | 954 (66.7%) | 929 (67.2%) | 25 (53.2%) |  |  |
| III | 327 (22.9%) | 308 (22.3%) | 19 (40.4%) |  |  |
| IV | 4 (0.3%) | 3 (0.2%) | 1 (2.1%) |  |  |
| **Surgical history** | 607 (42.4%) | 584 (42.2%) | 23 (48.9%) | 0.444 |  |
| **Surgical delay (days)** |  |  |  | 0.002* |  |
| <2 | 382 (26.7%) | 377 (27.3%) | 5 (10.6%) |  |  |
| 2-5 | 458 (32.0%) | 447 (32.3%) | 11 (23.4%) |  |  |
| ≥6 | 590 (41.3%) | 559 (40.4%) | 31 (66.0%) |  |  |
| **Fracture type** |  |  |  | 0.274 |  |
| Femoral neck fracture | 766 (53.6%) | 745 (53.9%) | 21 (44.7%) |  |  |
| Intertrochanteric fracture | 664 (46.4%) | 638 (46.1%) | 26 (55.3%) |  |  |
| **Preoperative comorbidities** |  |  |  |  |  |
| Hypertension | 465 (32.5%) | 444 (32.1%) | 21 (44.7%) | 0.099 |  |
| Diabetes mellitus | 172 (12.0%) | 162 (11.7%) | 10 (21.3%) | 0.079 |  |
| Cardiovascular disease | 95 (6.6%) | 89 (6.4%) | 6 (12.8%) | 0.157 |  |
| Heart disease | 300 (21.0%) | 286 (20.7%) | 14 (29.8%) | 0.185 |  |
| Liver disease | 38 (2.7%) | 35 (2.5%) | 3 (6.4%) | 0.249 |  |
| Renal disease | 12 (0.8%) | 11 (0.8%) | 1 (2.1%) | 0.864 |  |
| Chronic respiratory disease | 61 (4.3%) | 57 (4.1%) | 4 (8.5%) | 0.272 |  |
| Anemia | 2 (0.1%) | 2 (0.1%) | 0 (0.0%) | 1.000 |  |
| **Antibiotics type** |  |  |  | 0.770 |  |
| 1st cephalosporin | 1179 (82.4%) | 1148 (83.0%) | 40 (85.1%) |  |  |
| 2nd cephalosporin | 60 (4.2%) | 57 (4.1%) | 3 (6.4%) |  |  |
| 3rd cephalosporin | 84 (5.9%) | 82 (5.9%) | 2 (4.3%) |  |  |
| Other antibiotic | 98 (6.9%) | 96 (6.9%) | 2 (4.3%) |  |  |
| **Postoperative antibiotic use (days)** | 1.73 ± 1.31 | 1.72 ± 1.30 | 2.04 ± 1.47 | 0.092 |  |
| **Surgical duration (>180 minutes)** | 96 (6.7%) | 88 (6.4%) | 8 (17.0%) | 0.010* |  |
| **Operation type** |  |  |  | 0.260 |  |
| Arthroplasty | 513 (35.9%) | 492 (35.6%) | 21 (44.7%) |  |  |
| Osteosynthesis | 917 (64.1%) | 891 (64.4%) | 26 (55.3%) |  |  |
| **Anesthesia type** |  |  |  | 0.045* |  |
| General | 1051 (73.5%) | 1010 (73.0%) | 41 (87.2%) |  |  |
| Regional | 379 (26.5%) | 373 (27.0%) | 6 (12.8%) |  |  |
| **WBC (*109/L)** | 8.50 ± 2.50 | 8.49 ± 1.73 | 8.81 ± 3.60 | 0.398 |  |
| **NEU (*109/L)** | 5.13 ± 2.25 | 5.12 ± 2.19 | 5.49 ± 3.49 | 0.268 |  |
| **LYM (*109/L)** | 2.39 ± 0.92 | 2.40 ± 0.91 | 2.25 ± 1.02 | 0.262 |  |
| **ESR (mm/h)** | 20.47 ± 11.30 | 20.30 ± 11.10 | 25.45 ± 15.55 | 0.029* |  |
| **HCRP (mg/L)** | 5.64 ± 4.69 | 5.50 ± 3.90 | 9.87 ± 14.37 | 0.042* |  |
| **Systemic Inflammation Biomarkers** |  |  |  |  |  |
| NLR | 2.57 ± 1.73 | 2.56 ± 1.69 | 3.01 ± 2.65 | 0.080* |  |
| PLR | 117.32 ± 64.70 | 116.60 ± 64.26 | 138.31 ± 74.14 | 0.024* |  |
| LMR | 4.39 ± 2.70 | 4.37 ± 2.68 | 4.80 ±3 .10 | 0.280 |  |
| NPR | 0.02 ± 0.01 | 0.02 ± 0.01 | 0.02 ±0. 02 | 0.973 |  |
| PAR | 5.58 ± 1.41 | 5.56 ± 1.40 | 6.11 ±1. 61 | 0.009* |  |
| SII | 464.13 ± 172.81 | 462.00 ± 172.20 | 526.86 ± 180.76 | 0.011* |  |
| SIRI | 1.32 ± 0.74 | 1.33 ± 0.75 | 1.16 ± 0.57 | 0.117 |  |
| Note: *Statistical significance.  Abbreviations: SSI, surgical site infection; BMI, body mass index; ASA, American society of anesthesiologists; WBC, white blood cell; NEU, neutrophil; LYM, lymphocyte; ESR, erythrocyte sedimentation rate; HCRP, high-sensitivity C-reactive protein; NLR, neutrophil-to-lymphocyte ratio; PLR, platelet-to-lymphocyte ratio; LMR, lymphocyte-to-monocyte ratio; NPR, neutrophil-to- platelet ratio; PAR, platelet-to-albumin ratio; SII, systemic immune inflammation index; SIRI, System inflammation response index. | | | | |  |

| **Table 2 Multivariable Analyses of the Independent Risk Factors Associated with Postoperative SSI** | | | |
| --- | --- | --- | --- |
| **Variables** | **P value** | **Odds Ratio** | **95% CI** |
| **Age (years)** | <0.001* | 1.08 | 1.04-1.12 |
| **ASA class** |  |  |  |
| I-II | 1.000 |  |  |
| III-IV | 0.004* | 2.46 | 1.32-4.56 |
| **Surgical delay (days)** |  |  |  |
| <2 | 1.000 |  |  |
| 2-5 | 0.430 | 1.55 | 0.52-4.57 |
| ≥6 | 0.010* | 3.59 | 1.36-9.47 |
| **Surgical duration (>180 minutes)** | 0.020* | 2.72 | 1.17-6.35 |
| **Systemic Inflammation Biomarkers** |  |  |  |
| SII (≥541.1） | 0.015* | 2.25 | 1.17-4.33 |
| PAR (≥6.6） | 0.020* | 2.24 | 1.14-4.40 |
| Note: *Statistical significance.  Abbreviations: SSI, surgical site infection; OR, odd ratio; CI, confidence interval; ASA, American society of anesthesiologists; PAR, platelet-to-albumin ratio; SII, systemic immune inflammation index. | | | |
